# Supplementary material
Source: PubMed Central journal article supplement (PMC4006367)
Supplement: NIHMS560888-supplement-01.pdf [file NIHMS560888-supplement-01.pdf]

# THE LANCET **Oncology**

## **Supplementary appendix**

This appendix formed part of the original submission and has been peer reviewed. We post it as supplied by the authors.

Supplement to: Sieh W, Köbel M, Longacre TA, et al. Hormone-receptor expression and ovarian cancer survival: an Ovarian Tumor Tissue Analysis consortium study. *Lancet Oncol* 2013; published online July 9. [http://dx.doi.org/10.1016/S1470-2045\(13\)70253-5](http://dx.doi.org/10.1016/S1470-2045(13)70253-5).

**Supplementary Table 1. Hormone receptor expression and disease-specific survival, adjusted for extent of residual disease and other clinical covariates in seven sites<sup>a</sup>, by subtype.**

|                      | HGSC                     |       | LGSC                     |      | MC                       |      | EC                       |        | CCC                      |      |
|----------------------|--------------------------|-------|--------------------------|------|--------------------------|------|--------------------------|--------|--------------------------|------|
|                      | HR <sup>b</sup> (95% CI) | p     | HR <sup>b</sup> (95% CI) | p    | HR <sup>b</sup> (95% CI) | p    | HR <sup>b</sup> (95% CI) | p      | HR <sup>b</sup> (95% CI) | p    |
| <b>PR expression</b> |                          |       |                          |      |                          |      |                          |        |                          |      |
| Negative             | Referent                 |       | Referent                 |      | Referent                 |      | Referent                 |        | Referent                 |      |
| Weak                 | 1.01 (0.85-1.20)         | 0.90  | 0.52 (0.14-1.87)         | 0.31 | 0.44 (0.07-2.61)         | 0.37 | 0.45 (0.24-0.84)         | 0.013  | 1.19 (0.45-3.11)         | 0.73 |
| Strong               | 0.73 (0.53-1.00)         | 0.049 | 0.54 (0.18-1.61)         | 0.27 | 1.60 (0.51-5.01)         | 0.42 | 0.49 (0.26-0.92)         | 0.027  | 1.06 (0.35-3.23)         | 0.92 |
| <b>ER expression</b> |                          |       |                          |      |                          |      |                          |        |                          |      |
| Negative             | Referent                 |       | Referent                 |      | Referent                 |      | Referent                 |        | Referent                 |      |
| Weak                 | 0.91 (0.72-1.14)         | 0.41  | 2.04 (0.36-11.73)        | 0.42 | 1.00 (0.21-4.71)         | 1.00 | 0.45 (0.22-0.92)         | 0.028  | 1.39 (0.61-3.16)         | 0.43 |
| Strong               | 0.91 (0.75-1.10)         | 0.33  | 1.11 (0.21-5.73)         | 0.90 | 0.52 (0.16-1.64)         | 0.26 | 0.45 (0.27-0.76)         | 0.0026 | 1.09 (0.57-2.07)         | 0.79 |

HGSC=high-grade serous carcinoma; LGSC=low-grade serous carcinoma; MC=mucinous carcinoma; EC=endometrioid carcinoma; CCC=clear cell carcinoma.  
a. Seven sites (AOC, HAW, MAL, MAY+MAC, NOT, TOR, VAN) provided information on extent of residual disease following primary cytoreductive surgery.  
b. Hazard ratio (HR) and 95% confidence interval (CI) estimated using Cox regression stratified by site, and adjusted for age, age-squared, stage (localized, regional, advanced), and macroscopic residual disease (no, yes, unknown). We also adjusted for grade in models for HGSC (moderately, poorly differentiated), MC and EC (well, moderately, poorly differentiated).

**Supplementary Table 2. Progesterone receptor expression and high-grade serous carcinoma survival, unadjusted or adjusted for clinical covariates.**

| Covariate                           | All study sites          |        | All study sites          |         | Subset of 7 sites        |         |
|-------------------------------------|--------------------------|--------|--------------------------|---------|--------------------------|---------|
|                                     | HR <sup>a</sup> (95% CI) | p      | HR <sup>b</sup> (95% CI) | p       | HR <sup>c</sup> (95% CI) | p       |
| <b>PR expression</b>                |                          |        |                          |         |                          |         |
| Negative or weak                    | Referent                 |        | Referent                 |         | Referent                 |         |
| Strong                              | 0.65 (0.51-0.83)         | 0.0006 | 0.71 (0.55-0.91)         | 0.0061  | 0.73 (0.53-0.99)         | 0.044   |
| <b>Age (years)</b>                  |                          |        | 0.95 (0.92-0.99)         | 0.022   | 0.93 (0.88-0.97)         | 0.0025  |
| <b>Age-squared</b>                  |                          |        | 1.0005 (1.0002-1.0008)   | 0.0022  | 1.0007 (1.0003-1.0012)   | 0.0003  |
| <b>Stage</b>                        |                          |        |                          |         |                          |         |
| Localized                           |                          |        | Referent                 |         | Referent                 |         |
| Regional                            |                          |        | 1.79 (1.17-2.76)         | 0.0079  | 1.02 (0.60-1.74)         | 0.94    |
| Distant                             |                          |        | 4.78 (3.17-7.20)         | <0.0001 | 2.22 (1.35-3.67)         | 0.0018  |
| <b>Grade</b>                        |                          |        |                          |         |                          |         |
| Moderately differentiated           |                          |        | Referent                 |         | Referent                 |         |
| Poorly differentiated               |                          |        | 0.92 (0.80-1.06)         | 0.27    | 0.87 (0.74-1.02)         | 0.087   |
| <b>Macroscopic residual disease</b> |                          |        |                          |         |                          |         |
| No                                  |                          |        |                          |         | Referent                 |         |
| Yes                                 |                          |        |                          |         | 2.19 (1.78-2.68)         | <0.0001 |
| Unknown                             |                          |        |                          |         | 1.57 (1.17-2.11)         | 0.0025  |

Hazard ratio (HR) and 95% confidence interval (CI) estimated using Cox regression: (a) stratified by study site; (b) stratified by study site and adjusted for age, age-squared, stage (localized, regional, advanced) and grade (moderately, poorly differentiated) at diagnosis; (c) stratified by study site and adjusted for age, age-squared, stage (localized, regional, advanced), grade (moderately, poorly differentiated), and macroscopic residual disease (no, yes, unknown) using data from 7 sites (AOC, HAW, MAL, MAY+MAC, NOT, TOR, VAN).

**Supplementary Table 3. Hormone receptor expression and endometrioid carcinoma survival, unadjusted or adjusted for clinical covariates.**

| Covariate                           | All study sites          |         | All study sites          |         | Subset of 7 sites        |         |
|-------------------------------------|--------------------------|---------|--------------------------|---------|--------------------------|---------|
|                                     | HR <sup>a</sup> (95% CI) | p       | HR <sup>b</sup> (95% CI) | p       | HR <sup>c</sup> (95% CI) | p       |
| <b>Hormone receptor status</b>      |                          |         |                          |         |                          |         |
| Negative for ER and PR              | Referent                 |         | Referent                 |         | Referent                 |         |
| Positive for ER and/or PR           | 0.35 (0.23-0.54)         | <0.0001 | 0.33 (0.21-0.51)         | <0.0001 | 0.34 (0.20-0.57)         | <0.0001 |
| <b>Age (years)</b>                  |                          |         | 0.88 (0.77-1.00)         | 0.055   | 0.88 (0.75-1.04)         | 0.14    |
| <b>Age-squared</b>                  |                          |         | 1.0013 (1.0002-1.0024)   | 0.020   | 1.0013 (1.0000-1.0027)   | 0.054   |
| <b>Stage</b>                        |                          |         | Referent                 |         | Referent                 |         |
| Localized                           |                          |         |                          |         |                          |         |
| Regional                            |                          |         | 2.66 (1.33-5.33)         | 0.0057  | 3.27 (1.29-8.28)         | 0.012   |
| Distant                             |                          |         | 9.00 (4.40-18.42)        | <0.0001 | 8.07 (3.03-21.49)        | <0.0001 |
| <b>Grade</b>                        |                          |         | Referent                 |         | Referent                 |         |
| Well differentiated                 |                          |         |                          |         |                          |         |
| Moderately differentiated           |                          |         | 1.11 (0.60-2.04)         | 0.73    | 0.91 (0.43-1.91)         | 0.80    |
| Poorly differentiated               |                          |         | 2.10 (1.12-3.91)         | 0.020   | 1.89 (0.86-4.15)         | 0.11    |
| <b>Macroscopic residual disease</b> |                          |         |                          |         | Referent                 |         |
| No                                  |                          |         |                          |         |                          |         |
| Yes                                 |                          |         |                          |         | 2.29 (1.16-4.52)         | 0.017   |
| Unknown                             |                          |         |                          |         | 0.84 (0.36-1.97)         | 0.69    |

Hazard ratio (HR) and 95% confidence interval (CI) estimated using Cox regression: (a) stratified by study site; (b) stratified by study site and adjusted for age, age-squared, stage (localized, regional, advanced) and grade (well, moderately, poorly differentiated) at diagnosis; (c) stratified by study site and adjusted for age, age-squared, stage (localized, regional, advanced), grade (well, moderately, poorly differentiated), and macroscopic residual disease (no, yes, unknown) using data from 7 sites (AOC, HAW, MAL, MAY+MAC, NOT, TOR, VAN).

**Supplementary Table 4. Sensitivity analysis of hormone receptor expression and disease-specific\* survival censoring patients with unknown cause of death, by subtype.**

|                      | HGSC                     |       | LGSC                     |       | MC                       |       | EC                       |        | CCC                      |      |
|----------------------|--------------------------|-------|--------------------------|-------|--------------------------|-------|--------------------------|--------|--------------------------|------|
|                      | HR <sup>a</sup> (95% CI) | p      | HR <sup>a</sup> (95% CI) | p    |
| <b>PR expression</b> |                          |       |                          |       |                          |       |                          |        |                          |      |
| Negative             | Referent                 |       | Referent                 |       | Referent                 |       | Referent                 |        | Referent                 |      |
| Weak                 | 0.97 (0.83-1.14)         | 0.75  | 0.48 (0.19-1.19)         | 0.11  | 0.55 (0.11-2.83)         | 0.47  | 0.47 (0.25-0.88)         | 0.019  | 0.74 (0.31-1.79)         | 0.50 |
| Strong               | 0.71 (0.53-0.94)         | 0.016 | 0.34 (0.14-0.79)         | 0.012 | 1.17 (0.31-4.41)         | 0.82  | 0.43 (0.23-0.79)         | 0.0068 | 0.63 (0.14-2.75)         | 0.53 |
| <b>ER expression</b> |                          |       |                          |       |                          |       |                          |        |                          |      |
| Negative             | Referent                 |       | Referent                 |       | Referent                 |       | Referent                 |        | Referent                 |      |
| Weak                 | 1.20 (0.97-1.49)         | 0.10  | 1.03 (0.20-5.27)         | 0.97  | 1.30 (0.13-12.67)        | 0.82  | 0.43 (0.20-0.92)         | 0.029  | 1.75 (0.84-3.67)         | 0.14 |
| Strong               | 1.12 (0.93-1.36)         | 0.24  | 0.75 (0.18-3.08)         | 0.69  | 0.28 (0.08-0.94)         | 0.039 | 0.42 (0.25-0.71)         | 0.0013 | 1.18 (0.63-2.23)         | 0.61 |

HGSC=high-grade serous carcinoma; LGSC=low-grade serous carcinoma; MC=mucinous carcinoma; EC=endometrioid carcinoma; CCC=clear cell carcinoma.

\* Failures were defined as deaths due to ovarian cancer, and deaths due to unknown causes were censored.

a. Hazard ratio (HR) and 95% confidence interval (CI) estimated using Cox regression stratified by site, and adjusted for age, age-squared, and stage (localized, regional, advanced) at diagnosis. We also adjusted for grade in models for HGSC (moderately, poorly differentiated), MC and EC (well, moderately, poorly differentiated).

**Supplementary Table 5. Hormone receptor expression and overall survival, by subtype.**

|                      | HGSC                     |       | LGSC                     |       | MC                       |      | EC                       |        | CCC                      |      |
|----------------------|--------------------------|-------|--------------------------|-------|--------------------------|------|--------------------------|--------|--------------------------|------|
|                      | HR <sup>a</sup> (95% CI) | p     | HR <sup>a</sup> (95% CI) | p     | HR <sup>a</sup> (95% CI) | p    | HR <sup>a</sup> (95% CI) | p      | HR <sup>a</sup> (95% CI) | p    |
| <b>PR expression</b> |                          |       |                          |       |                          |      |                          |        |                          |      |
| Negative             | Referent                 |       | Referent                 |       | Referent                 |      | Referent                 |        | Referent                 |      |
| Weak                 | 1.00 (0.87-1.15)         | 0.96  | 0.56 (0.24-1.26)         | 0.16  | 0.69 (0.24-2.02)         | 0.50 | 0.72 (0.46-1.13)         | 0.16   | 0.81 (0.36-1.83)         | 0.62 |
| Strong               | 0.74 (0.58-0.94)         | 0.013 | 0.46 (0.22-0.94)         | 0.034 | 0.99 (0.40-2.46)         | 0.98 | 0.43 (0.26-0.70)         | 0.0008 | 1.24 (0.50-3.06)         | 0.64 |
| <b>ER expression</b> |                          |       |                          |       |                          |      |                          |        |                          |      |
| Negative             | Referent                 |       | Referent                 |       | Referent                 |      | Referent                 |        | Referent                 |      |
| Weak                 | 1.00 (0.83-1.21)         | 0.96  | 1.23 (0.34-4.48)         | 0.76  | 1.44 (0.41-5.01)         | 0.57 | 0.51 (0.30-0.87)         | 0.014  | 1.65 (0.84-3.25)         | 0.14 |
| Strong               | 1.01 (0.86-1.18)         | 0.92  | 0.79 (0.24-2.58)         | 0.70  | 0.71 (0.35-1.47)         | 0.36 | 0.50 (0.33-0.75)         | 0.0007 | 1.26 (0.76-2.08)         | 0.38 |

HGSC=high-grade serous carcinoma; LGSC=low-grade serous carcinoma; MC=mucinous carcinoma; EC=endometrioid carcinoma; CCC=clear cell carcinoma.  
a. Hazard ratio (HR) and 95% confidence interval (CI) estimated using Cox regression stratified by site, and adjusted for age, age-squared, and stage (localized, regional, advanced) at diagnosis. We also adjusted for grade in models for HGSC (moderately, poorly differentiated), MC and EC (well, moderately, poorly differentiated).

**Supplementary Table 6. Association of clinical prognostic factors with hormone receptor status in endometrioid carcinoma.**

| Clinical prognostic factor                         | Negative for ER and PR<br>n (%) | Positive for ER and/or PR<br>n (%) | Exact p <sup>a</sup> |
|----------------------------------------------------|---------------------------------|------------------------------------|----------------------|
| <b>Grade, N</b>                                    | 83                              | 368                                | 0.0007               |
| Well differentiated                                | 17 (20.5)                       | 148 (40.2)                         |                      |
| Moderately differentiated                          | 31 (37.4)                       | 127 (34.5)                         |                      |
| Poorly differentiated                              | 35 (42.2)                       | 93 (25.3)                          |                      |
| <b>Stage, N</b>                                    | 83                              | 368                                | 0.57                 |
| Localized                                          | 27 (32.5)                       | 118 (32.1)                         |                      |
| Regional                                           | 34 (41.0)                       | 170 (46.2)                         |                      |
| Distant                                            | 22 (26.5)                       | 80 (21.7)                          |                      |
| <b>Macroscopic residual disease<sup>b</sup>, N</b> | 62                              | 278                                | 0.041                |
| No                                                 | 45 (72.6)                       | 230 (82.7)                         |                      |
| Yes                                                | 10 (16.1)                       | 17 (6.1)                           |                      |
| Unknown                                            | 7 (11.3)                        | 31 (11.2)                          |                      |

a. Unadjusted p-value for Fisher's exact test.

b. Seven sites (AOC, HAW, MAL, MAY+MAC, NOT, TOR, VAN) provided information on extent of residual disease following primary cytoreductive surgery.

**Supplementary Table 7. Association of clinical prognostic factors with progesterone receptor status in high-grade serous carcinoma.**

| Clinical prognostic factor                         | Negative<br>n (%) | PR status     |                 | Exact p <sup>a</sup> |
|----------------------------------------------------|-------------------|---------------|-----------------|----------------------|
|                                                    |                   | Weak<br>n (%) | Strong<br>n (%) |                      |
| <b>Stage</b>                                       | 1144              | 393           | 124             | 0·0029               |
| Localized                                          | 46 (4·0)          | 25 (6·4)      | 10 (8·1)        |                      |
| Regional                                           | 172 (15·0)        | 83 (21·1)     | 23 (18·6)       |                      |
| Distant                                            | 926 (80·9)        | 285 (72·5)    | 91 (73·4)       |                      |
| <b>Macroscopic residual disease<sup>b</sup>, N</b> | 733               | 267           | 81              | 0·11                 |
| No                                                 | 232 (31·6)        | 89 (33·3)     | 35 (43·2)       |                      |
| Yes                                                | 417 (56·9)        | 152 (56·9)    | 34 (42·0)       |                      |
| Unknown                                            | 84 (11·5)         | 26 (9·7)      | 12 (14·8)       |                      |
| <b>BRCA1/2 mutation carrier<sup>c</sup>, N</b>     | 255               | 96            | 25              | 0·072                |
| No                                                 | 224 (87·8)        | 75 (78·1)     | 21 (84·0)       |                      |
| Yes                                                | 31 (12·2)         | 21 (21·9)     | 4 (16·0)        |                      |

a. Unadjusted p-value for Fisher's exact test.

b. Seven sites (AOC, HAW, MAL, MAY+MAC, NOT, TOR, VAN) provided information on extent of residual disease following primary cytoreductive surgery.

c. Four sites (AOC, MAL, MAY+MAC, STA) provided *BRCA1* and *BRCA2* germline mutation data.



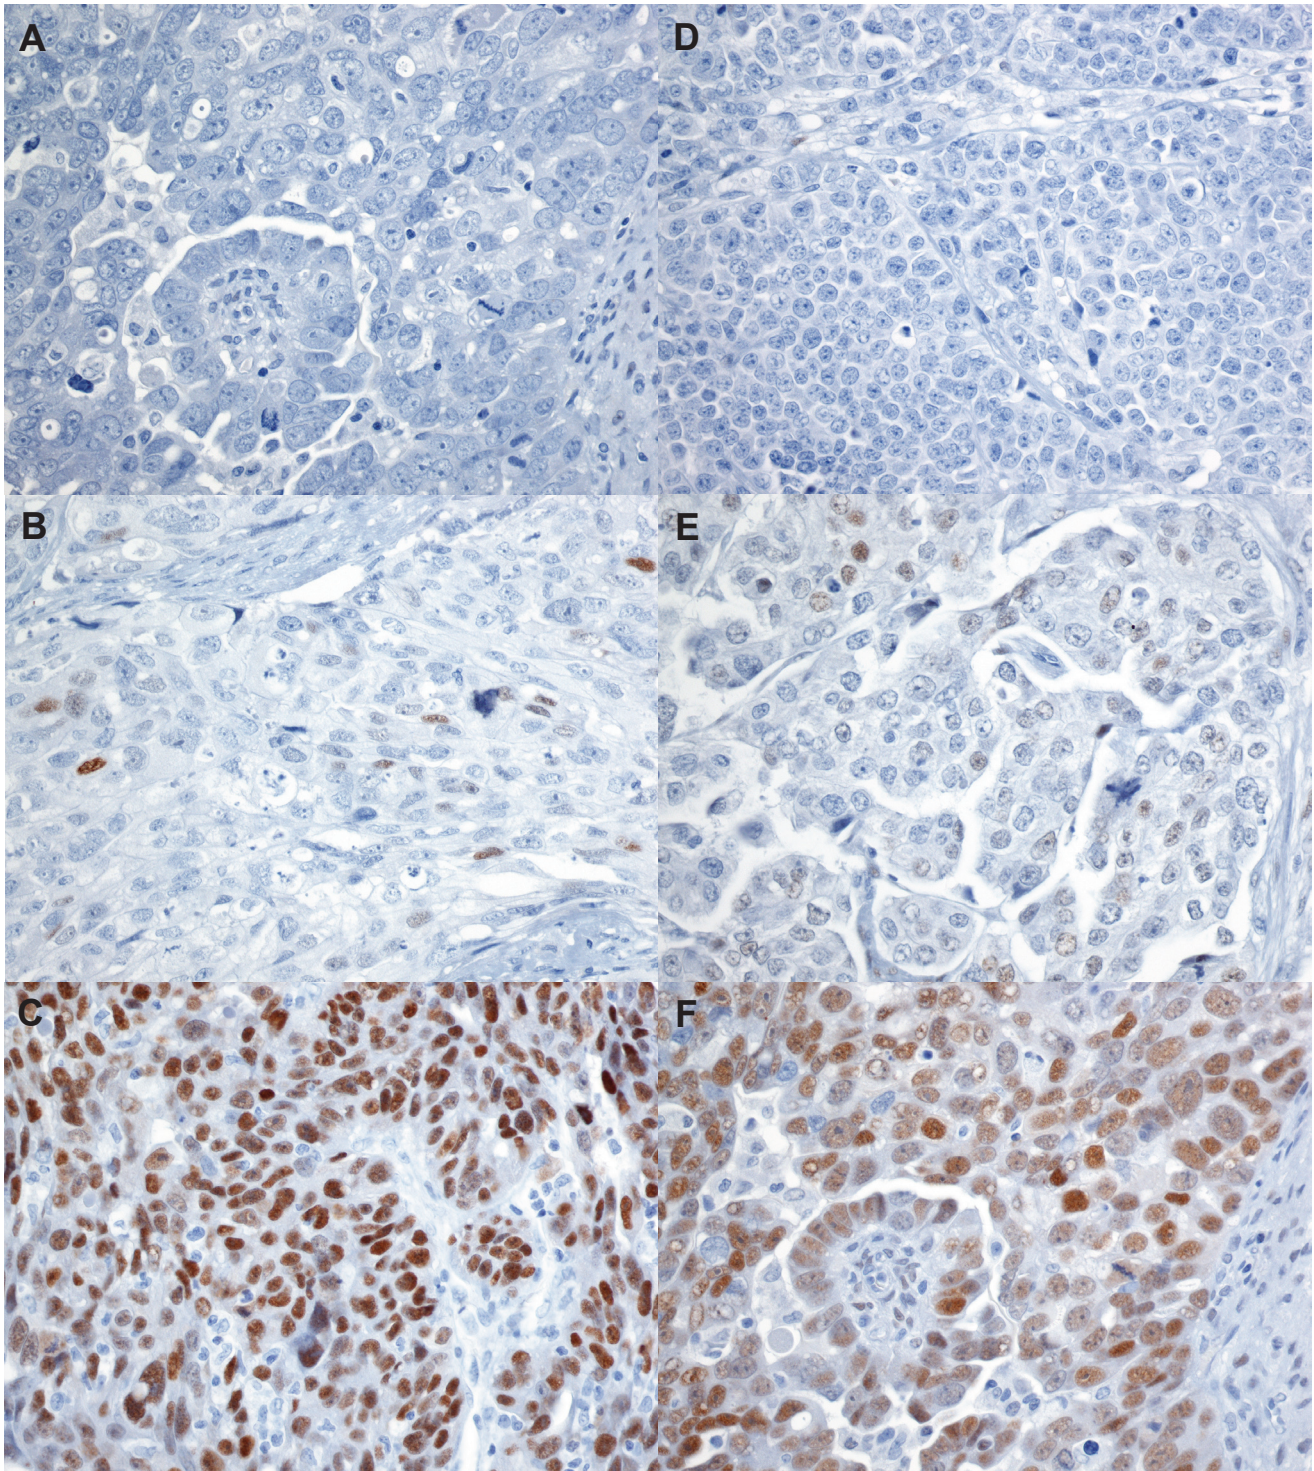

**Supplementary Figure 1. Immunohistochemical evaluation of high-grade serous ovarian carcinoma at 200× magnification.** Panels illustrate: negative (A), weakly (B) and strongly (C) positive staining for PR (Roche clone 1E2); and negative (D), weakly (E) and strongly (F) positive staining for ER (Thermo clone SP1, 1:25).

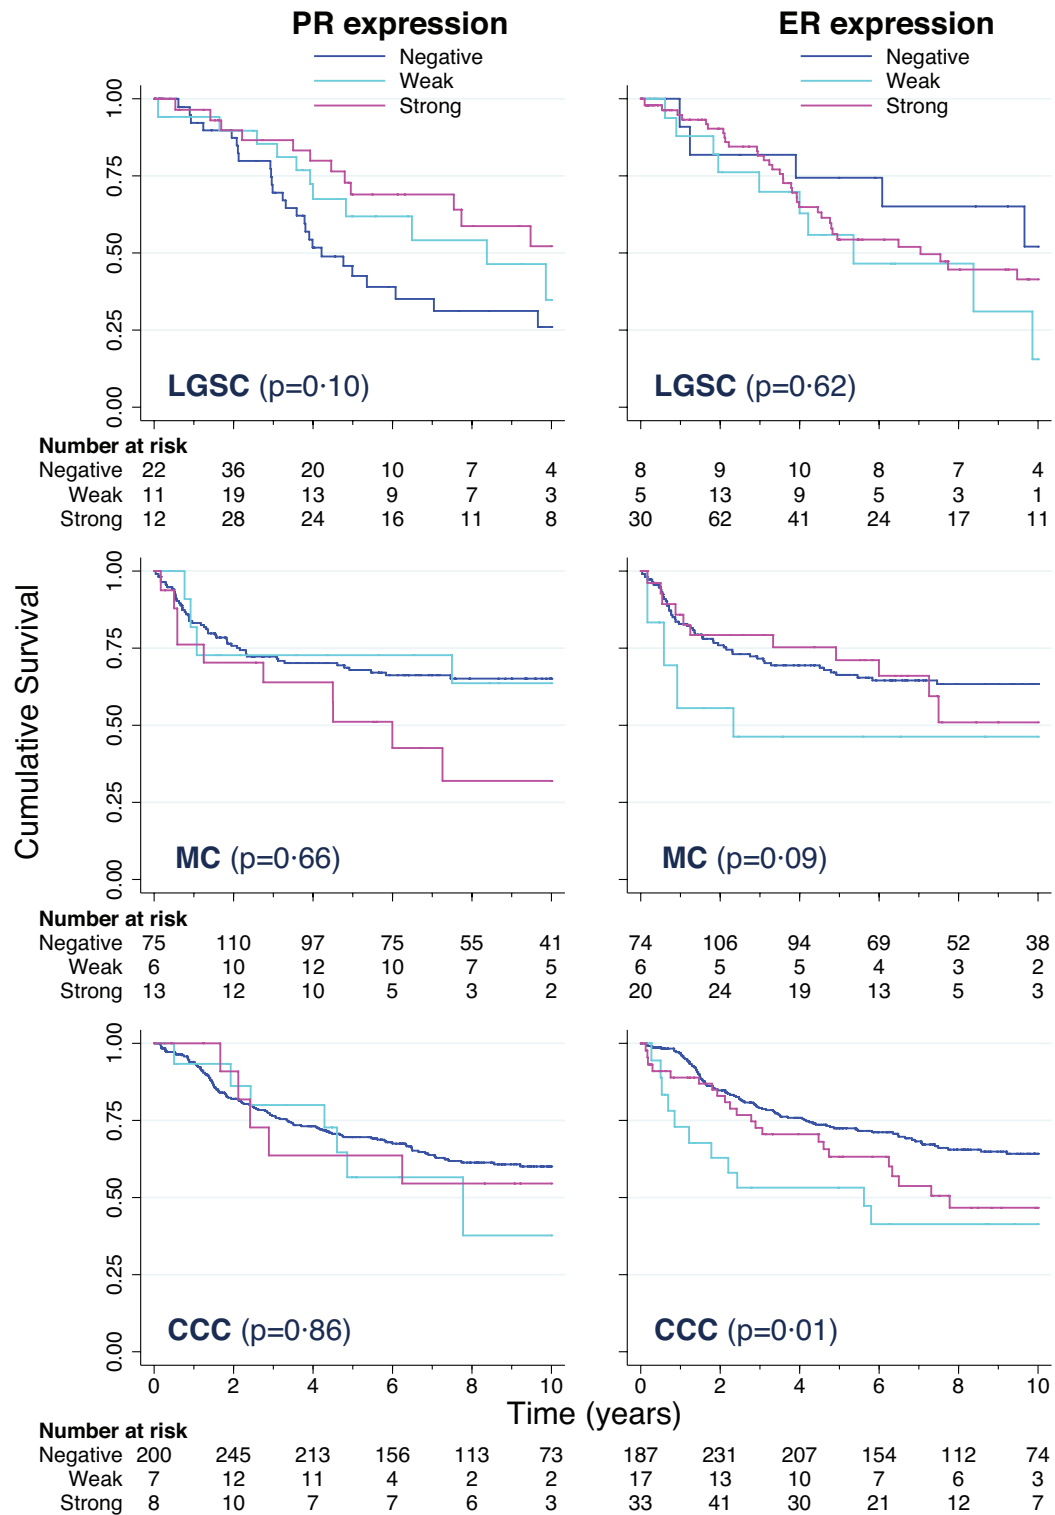

**Supplementary Figure 2. Kaplan-Meier curves of disease-specific survival for low-grade serous (LGSC), mucinous (MC), and clear cell (CCC) carcinomas, according to hormone receptor status.** The data were left truncated to avoid potential survival bias from the inclusion of patients (<10%) enrolled >1 year after diagnosis, and right censored at 10 years. P-values correspond to log-rank tests of the equality of survivor functions across hormone receptor expression levels, stratified by study site.
